# Supplementary material
Source: Springer Nature journal article supplement (https://www.springerprofessional.de/resource/supplementary/13173_2013_9_MOESM9_ESM.pdf/11897010)

Number of keywords

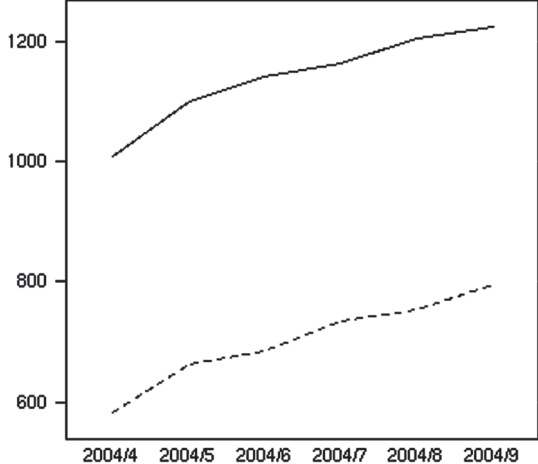

2004/4 2004/5 2004/6 2004/7 2004/8 2004/9

Months

Keywords with frequency > 1 ———

Keywords with frequency = 1 - - - - -

Supplement: MOESM9 [file 11897010]
